# Supplementary material for: New family of layered N-based cathode materials for sodium-ion batteries
Source: Royal Society of Chemistry journal article supplement (doi:10.1039/d2ra06336k), 2022-01-01
Supplement: d2ra06336k1.pdf [file d2ra06336k1.pdf]

**Electronic supplementary information (ESI)**

**New Family of Layered N-Based Cathode Materials for Sodium-Ion  
Batteries**

Yundan Jiang, Wangping Xu, Wei Zhao\*, Juexian Cao\*

*a: Department of Physics & Hunan Institute of Advanced Sensing and Information  
Technology, Xiangtan University, Xiangtan 411105, PR China*

\*Corresponding authors: zhaowei@xtu.edu.cn; jxcao@xtu.edu.cn

## Supplementary Figures

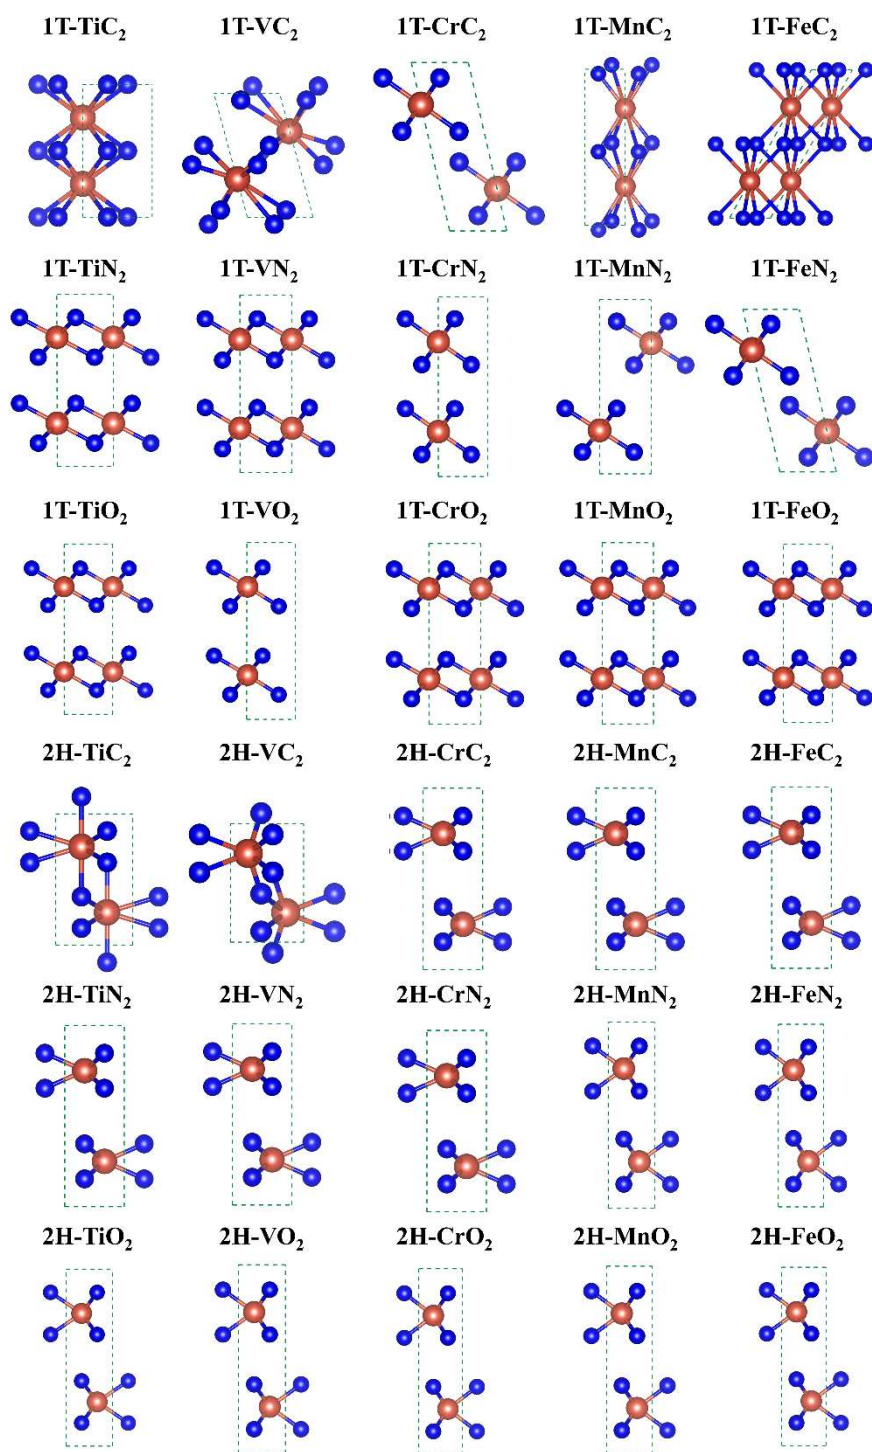

**Fig. S1** The fully optimized structures of 1T- and 2H-phase MX<sub>2</sub> (M=Ti, V, Cr, Mn and Fe; X=C, N and O). (Brown and blue balls represent M and X atoms, respectively).

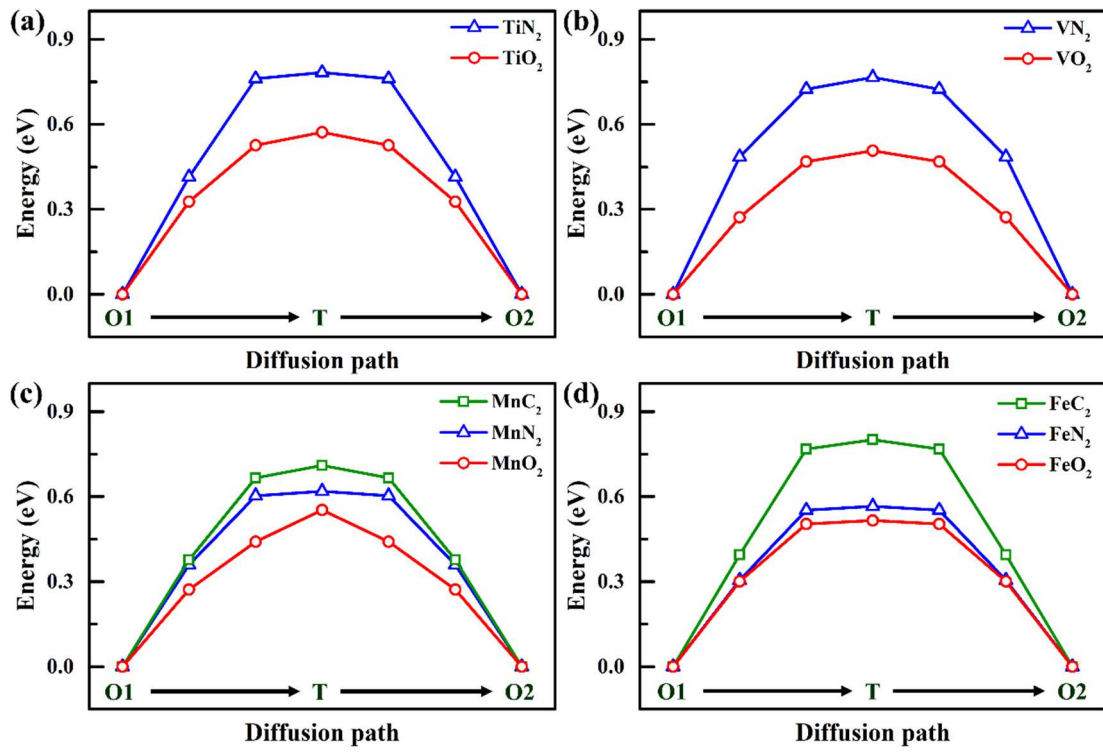

**Fig. S2** Energy profile of Na diffusing along the diffusion path in 2H-phase MX<sub>2</sub> (M=Ti, V, Mn and Fe; X=C, N and O).

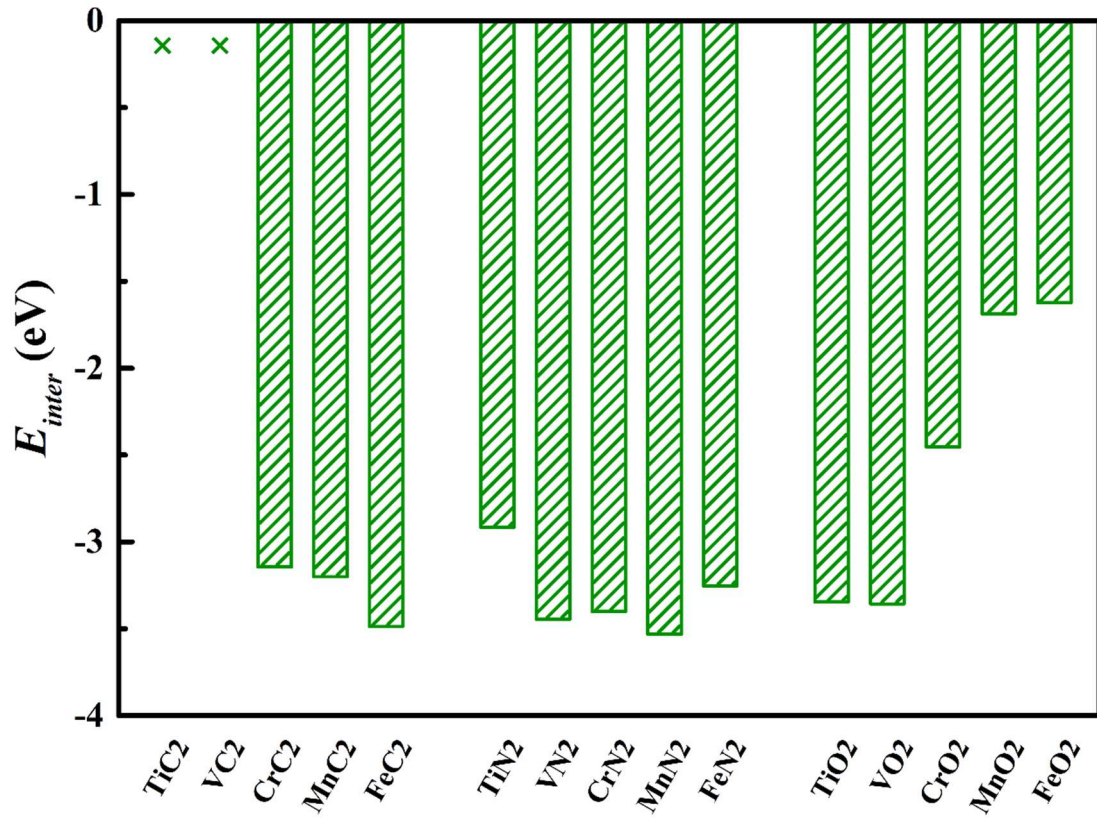

**Fig. S3** The intercalation energy for Na intercalated in 2H-phase MX<sub>2</sub> (M=Ti, V, Cr, Mn and Fe; X=C, N and O). (Note: The intercalation energy  $E_{inter}$  is defined as  $E_{inter} = E_{NaMX_2} - E_{MX_2} - \mu_{Na}$ , here the  $E_{NaMX_2}$  and  $E_{MX_2}$  represent the total energy of NaMX<sub>2</sub> and MX<sub>2</sub> respectively, and the  $\mu_{Na}$  is the chemical potential of Na atom.)

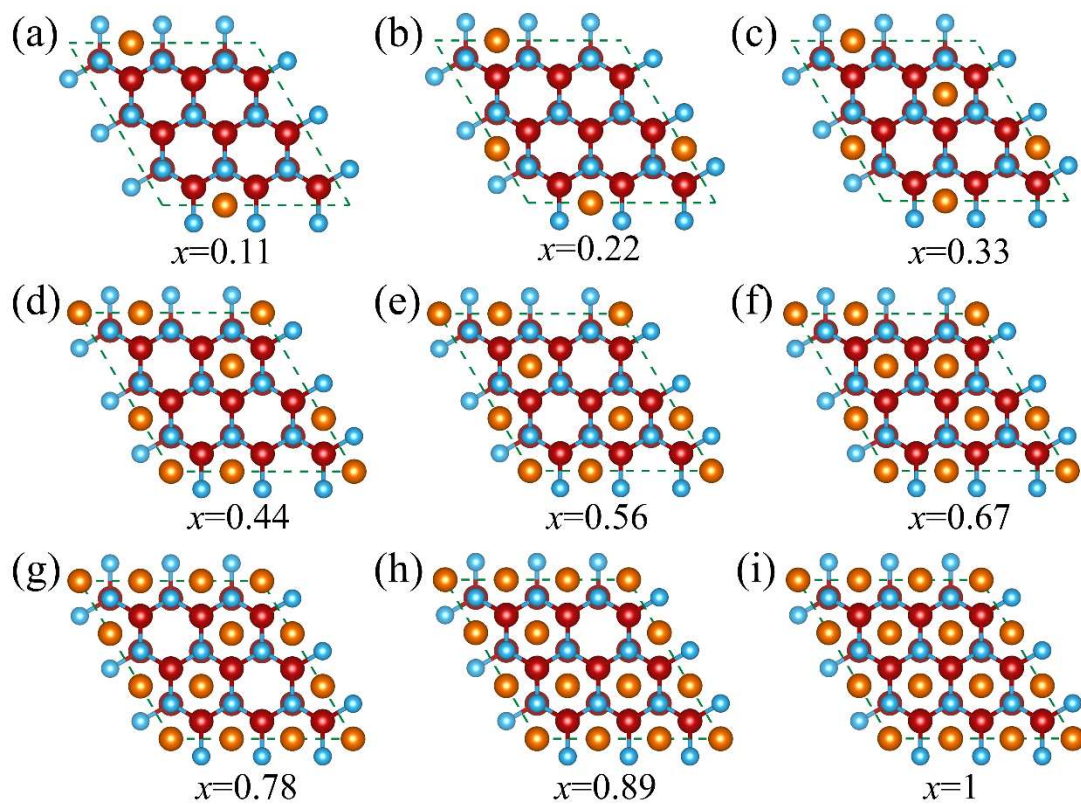

**Fig. S4** The most stable configuration of  $\text{Na}_x\text{CrN}_2$  ( $x = 0 \sim 1$ ) under different sodium concentrations. (Light brown balls, dark red balls and light blue balls represent sodium, chromium, and nitrogen, respectively).

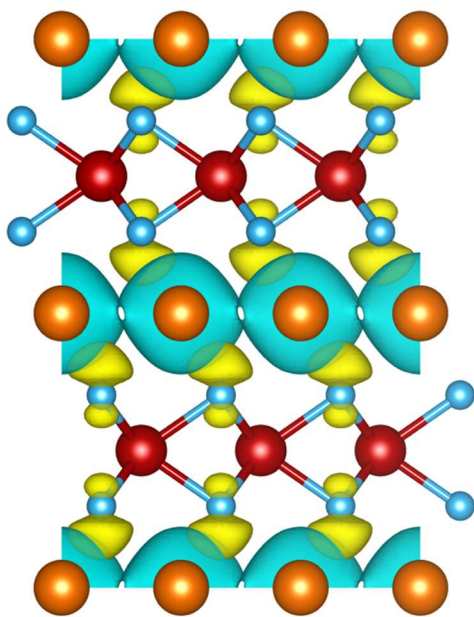

**Fig. S5** Differential charge density of NaCrN<sub>2</sub>. (Light brown balls, dark red balls, and light blue balls represent sodium, chromium, and nitrogen, respectively. Yellow areas and cyan areas represent electron-rich regions and electron-deficient regions, respectively. Isosurface level is set to 0.01 e/Å<sup>3</sup>).

## Supplementary Tables

**Table S1** Calculated lattice parameters of all MX<sub>2</sub> structures (M=Ti, V, Cr, Mn and Fe; X=C, N and O).

|    |         | C    |      | N    |      | O    |      |
|----|---------|------|------|------|------|------|------|
|    |         | 1T   | 2H   | 1T   | 2H   | 1T   | 2H   |
| Ti | $a$ (Å) | 3.04 | 3.75 | 3.10 | 3.19 | 2.98 | 2.89 |
|    | $c$ (Å) | 5.70 | 5.53 | 8.19 | 8.13 | 9.02 | 9.51 |
| V  | $a$ (Å) | 3.50 | 4.12 | 2.89 | 3.08 | 2.90 | 2.74 |
|    | $c$ (Å) | 6.22 | 4.53 | 8.55 | 8.06 | 9.09 | 9.59 |
| Cr | $a$ (Å) | 2.69 | 3.06 | 2.72 | 3.08 | 2.89 | 2.62 |
|    | $c$ (Å) | 8.19 | 8.63 | 8.57 | 8.13 | 8.73 | 9.74 |
| Mn | $a$ (Å) | 2.46 | 3.02 | 2.79 | 2.65 | 2.88 | 2.65 |
|    | $c$ (Å) | 8.30 | 8.19 | 8.16 | 9.15 | 8.81 | 9.53 |
| Fe | $a$ (Å) | 2.54 | 2.97 | 2.81 | 2.61 | 2.80 | 2.68 |
|    | $c$ (Å) | 9.37 | 8.34 | 7.73 | 9.11 | 8.85 | 9.32 |

**Table S2** Lattice constant  $a$  and layer thickness  $h$  of VN<sub>2</sub>.

|                 |                     | $a$ (Å) | $h$ (Å) |
|-----------------|---------------------|---------|---------|
| VN <sub>2</sub> | Our                 | 3.08    | 1.57    |
|                 | Other <sup>43</sup> | 3.10    | 1.55    |

Note: Ref. 43 was cited in main article.

43 Y. Dong, Z. Tang, P. Liang, H. Wan, H. Wang, L. Wang, H. Shu and D. Chao, *J. Colloid Interf. Sci.*, 2021, **593**, 51-58.

**Table S3** Relaxed atomic positions for 2H-phase CrN<sub>2</sub> whose space group is P6<sub>3</sub>/mmc.

| Atom | <i>x</i> | <i>y</i> | <i>z</i> |
|------|----------|----------|----------|
| Cr 1 | 0.333    | 0.666    | 0.250    |
| Cr 2 | 0.666    | 0.333    | 0.750    |
| N 1  | 0.666    | 0.333    | 0.158    |
| N 2  | 0.666    | 0.333    | 0.342    |
| N 3  | 0.333    | 0.666    | 0.658    |
| N 4  | 0.333    | 0.666    | 0.842    |
